# Supplementary material
Source: publisher figshare collection journal article supplement (https://sage.figshare.com/ndownloader/files/14870219)
Supplement: Supplementary file 1 [file 14870219]

## **Survey 1: Program Director Survey**

### **1. Program location**

|                                                 |                                        |
|-------------------------------------------------|----------------------------------------|
| North East (NY, CT, RI, MA, VT, NH, ME)         | North Central (ND, SD, NE, KS, MO, IA) |
| Mid Atlantic (NC, Va, MD, DC, DE, PA, NJ)       | Southwest (AZ, CO, NM, NV, UT)         |
| South East (TN, KY, LA, MS, AL, GA, FL, SC, WV) | West (CA, HI, AK)                      |
| Great Lakes (MN, MI, WI, IL, IN, OH)            | Northwest (WA, OR, ID, MT, WY)         |
| South Central (TX, OK, AR)                      |                                        |

### **2. Program size (per year)**

1 or fewer      2      3      4      5      6 or more

### **3. Program affiliation**

Standalone Children's Hospital  
Hospital-within-a-hospital  
Other (Please specify)

### **4. Program type**

Child Neurology      NDD

### **5. Does your program have any established international collaborations? Please do not include experiences available to trainees during general pediatric training (governed by divisions other than neurology/neurosciences)**

Yes      No

#### **5.1 What country/countries is this collaboration in?**

#### **5.2 What is the site of this/these collaboration(s)? select all that apply**

Private or public university hospital  
Private or public non-university hospital  
Field hospitals, infirmaries, outposts, rehabilitation units  
Medical missions via third parties (ie., ministries, NGOs)

#### **5.3 What is the nature of these collaborations? Select all that apply**

Clinical (ie., rotations to assist in direct patient care)  
Educational (ie., staff assists in education of local staff, not directly in patient care)

Research (ongoing collaborations to yield joint projects and publications)

Telemedicine (ie., clinical assistance provided at a distance, such as EEG interpretation)

**5.3.1 If there is a clinical component, is there a longitudinally sustained presence of your institution at the host institution? ('sustained' defined as at least two yearly missions- regardless of duration- to a single site over at least 3 continuous years)**

Yes    No    No direct clinical component

**5.4 Other than resources allocated to research and those specific to travel periods, has your institution directly, or via third-party grants, invested financially in the development of this collaboration? (ie., investment in infrastructure, materials/equipment)**

No    Yes (please specify)

**5.5 Has/have these collaborations yielded any published or public research results? (ie., publications, presentations, posters)**

No    Yes (please specify)

**5.6 Over the past 5 years, how many trainees have participated in away rotations at this/these collaboration site(s)?**

**5.7 Are trainees/staff from the host institution allowed or invited to rotate at your institution?**

Yes    No

**5.8 Please list the 3 major obstacles/hurdles encountered in the establishment of this collaboration**

## **Curriculum development**

**6. Does your program have a global health curriculum? (ie., a lecture series on international neurology/NDD topics)**

Yes    No

**6.1 Please list the 5 main topics addressed in your curriculum**

**6.2 Does your curriculum include orientation or crash courses?**

Yes    No

**6.3 If trainees are allowed to travel for child neurology-specific global health electives, is there a formal pre-trip briefing/course and/or post-trip debriefing process?**

Yes    No    Travel not allowed

**6.4 Does your program have a global health track? (ie., established global health curriculum, established collaborations, authorization to travel on foreign electives and a pre-trip/post-trip brief/debrief)**

Yes      No

**6.4.1 Does the track include any foreign language educational or cultural component?**

No      Yes (please specify)

**6.4.2 Des the track require/encourage or sponsor advanced degrees? (ie., MPH, MSc, MHA)**

No      Yes (please specify)

**7. If you attempted to establish a global health collaboration but were unable to, what were the major obstacles that you consider made this impossible?**

Did not attempt

Did attempt (please specify obstacles)

**Survey 2: Trainees**

**1. Training program location**

North East (NY, CT, RI, MA, VT, NH, ME)

North Central (ND, SD, NE, KS, MO, IA)

Mid Atlantic (NC, Va, MD, DC, DE, PA, NJ)

Southwest (AZ, CO, NM, NV, UT)

South East (TN, KY, LA, MS, AL, GA, FL, SC, WV)

West (CA, HI, AK)

Great Lakes (MN, MI, WI, IL, IN, OH)

Northwest (WA, OR, ID, MT, WY)

South Central (TX, OK, AR)

**2. Your age**

30 or younger

31-35

36 or older

**3. Your gender**

Male

Female

Rather not say

**4. Location of medical school**

United States

International

Rather not say

**5. Where are you in your training**

Child Neurology

NDD

**6. Are you interested in opportunities in global health in child neurology/NDD? Select all that apply**

Yes, in clinical settings

Yes in telemedicine

Yes, in research settings      Yes, other (specify)  
Yes, in educational settings      Not interested

**7. Did global health opportunities influence your decision in ranking child neurology or NDD training programs?**

Yes, significantly      Yes, somewhat      No influence

**8. Have you participated, or intend to participate in GH rotations during your CN/NDD training?**

Yes (please specify)      No

**9. How long have you been to a global health site? (open question)**

**10. Do you intend to return to this site either as a trainee or after completion of training?**

Yes      No

**11. Has this participation/rotation yielded any published or public results? I.e., publications, presentations, posters)**

No      Yes (please specify)

**12. Please list the 3 most important obstacles/hurdles you encountered for/during this global health rotation**

**13. Did you receive any focused pre-travel education in global health prior to these rotation?**

Yes      No

**14. What is/was the nature of this rotation? Select all that apply**

Clinical (ie., rotations to assist in direct patient care)

Educational (ie., staff assists in education of local staff, not directly in patient care)

Research (ongoing collaborations to yield joint projects and publications)

Telemedicine (ie., clinical assistance provided at a distance, such as EEG interpretation)

**15. How is trainee travel generally financed? Please select all that apply**

My institution pays for travel      Local institution pays for travel

Travel grants from third parties      Self funded
